# Supplementary material for: Sodion Induced Interfacial Polarization and π‒π Synergy Enable Irreversible Dye Adsorption in g‒C3N4 Quantum Dot–Embedded Hydrogels
Source: Research Square preprint supplement (doi:10.21203/rs.3.rs-8429060/v1), 2026-01-05
Supplement: Supplementary file 1 [file 32f31b720e95fb2360ce0786.docx]

Supporting Information

Sodion Induced Interfacial Polarization and π‒π Synergy Enable Irreversible Dye Adsorption in g‒C3N4 Quantum Dot–Embedded Hydrogels

Qi Cui1, Xiang Li1, Xiaochuan Li1, and Wenjian Fang1*

1 School of Electrical and Energy Power Engineering, Yangzhou University, Yangzhou 225002, China.

*E-mail: [fwjlf2227@163.com](mailto:fwjlf2227@163.com)

Supporting Content

1.1 Characterization

1.2 The swelling behavior of hydrogels

1.3 pH-dependent adsorption experiment

1.4 Photocatalytic performance test

1.5 Analysis of adsorption kinetics

1.6 Numerical solution

**Table S1.** Adsorption and desorption kinetic parameters of MB on CNQD/PAM and TDQD/PAM hydrogels

**Fig. S1** Titanium dioxide quantum dot (TDQD) colloid (left) and TDQD/PAM hydrogel (right)

**Fig. S2** g-C3N4 quantum dots (CNQD) colloid (left) and CNQD/PAM hydrogel (right)

**Fig. S3** HRTEM images of TDQD/PAM and CNQD/PAM

**Fig. S4** Swelling behavior of CNQD/PAM and TDQD/PAM hydrogels over time

**Fig. S5.** Decomposition of adsorbed MB under light irradiation in CNQD/PAM

1.1 Characterization

The obtained samples were characterized by various means. Its surface morphology was observed by Hitachi S-4800 scanning electron microscope (SEM). Transmission electron microscopy (TEM) was used to analyze particle morphology and dispersion, while high-resolution transmission electron microscopy (HRTEM) was used to observe lattice fringes and determine crystal structure. All related tests were completed on the Tecnai G2 F30 (300 kV) instrument. The chemical state of the samples was determined by X-ray photoelectron spectroscopy (XPS) using the ESCALAB-250Xi photoelectron spectrometer. Fourier Transform Infrared spectroscopy (FTIR) was obtained by the Varian Cary 610/670 micro infrared spectrometer, while ultraviolet-visible diffuse reflectance spectroscopy (DRS) was determined by the Varian Cary 5000 ultraviolet-visible spectrophotometer.

1.2 The swelling behavior of hydrogels

The swelling behavior of the composite hydrogel in deionized water was monitored by gravimetric method. The specific operation is as follows: Place the pre-weighed dry hydrogel sample in a 100 mL beaker containing 50 mL of deionized water and seal it with plastic film to prevent evaporation. Subsequently, place the beaker in a 50 °C hot blast stove to avoid the influence of environmental temperature fluctuations on the experiment, thereby ensuring that the swelling process takes place under relatively stable conditions. At the preset time intervals, take out the expanded hydrogel, gently absorb the residual moisture on the surface with a paper towel, and weigh it immediately. The water absorption rate of the sample is calculated by the following formula:

(SI.1)

Here, S represents the swelling ratio, W is the mass of the hydrogel after swelling, and W0 is the mass of the dry gel.

Porosity calculation

(SI.2)

(SI.3)

Here,

：The volume of dry gel;

：The total volume after swelling equilibrium;

：The volume of pores;

：Polymer skeleton volume (assuming that the volume of the polymer skeleton remains approximately unchanged during the water absorption process);

：Swelling ratio;

：Porosity.

1.3 pH-dependent adsorption experiment.

To investigate the effect of pH on adsorption behavior, a separate set of experiments was conducted under identical conditions using the same batch of CNQD colloids to eliminate batch-to-batch variations. Because of the limited sample amount, the mass of each hydrogel used in this test was smaller than that in the standard adsorption experiment. To ensure complete adsorption equilibrium, the samples were immersed in MB solutions for one week before measurement.

1.4 Photocatalytic performance test

To evaluate the photocatalytic degradation ability of the CNQD/PAM hydrogels after the adsorption–desorption cycle, the samples were subjected to simulated sunlight irradiation using a 300 W xenon lamp following MB adsorption (48 h) and desorption (24 h). During illumination, the temporal changes in gel color and morphology were monitored, and both top-view and side-view images were recorded to characterize the light-driven degradation behavior of the retained dye.

1.5 Analysis of adsorption kinetics

Pseudo-first-order model

The integral form of the pseudo-first-order model generally expressed as follows:

(SI.4)

Where，

：amount adsorbed at equilibrium（mg g-1）;

：amount adsorbed at time t（mg g-1）;

：the pseudo-first-order rate constant（min-1）;

：adsorption time（min）.

Pseudo-second-order model

The pseudo-second-order model was expressed by the following equation:

(SI.5)

Where，

：amount adsorbed at equilibrium（mg g-1）;

：amount adsorbed at time t（mg g-1）;

：the pseudo-second-order rate constant（min-1）;

：adsorption time（min）.

1.6 Numerical solution

Since the governing equation is a partial differential-ordinary differential coupled system, it is difficult to obtain through analytical solution. Therefore, the finite difference method is adopted for numerical solution. The basic idea is to discretize the continuous spatial and temporal variables into a finite grid of points, replace the derivative operation with the difference approximation, thereby converting the partial differential equation into an algebraic system of equations, and gradually solve it iteratively in the time step.

The construction of discrete grids

The radial interval is divided into equally spaced grid points, and the time interval is also discretized into equally spaced steps:

(SI.6)

(SI.7)

Where, and are the steps in space and time respectively, representing the total time length of the calculation (i.e., the end point of the time domain), and are the radius of the equivalent sphere.

Finite difference approximation of derivatives

The time derivative is approximated by the forward difference:

, (SI.8)

The radial diffusion term uses the second-order central difference: (SI.9)

Discretization of boundary conditions：

At the gel surface, the Robin boundary condition discretizes as:

(SI.10)

The variation of the outer liquid concentration is determined by the interfacial flux, and its discrete form is:

(SI.11)

Through the above processing, the original PDE-ODE coupling system is transformed into a closed system of equations in algebraic form, which can be stably and iteratively solved.

**Table S1.** Adsorption and desorption kinetic parameters of MB on CNQD/PAM and TDQD/PAM hydrogels

| Sample | | Pseudo-first-order model | | Pseudo-second-order model | |
| --- | --- | --- | --- | --- | --- |
|  |  |  |  |
| CNQD/PAM | Adsorption | 0.05385 | 0.99148 | 0.03945 | 0.98622 |
| Desorption | 0.03172 | 0.97262 | 0.06967 | 0.97316 |
| TDQD/PAM | Adsorption | 0.06571 | 0.97102 | 0.18716 | 0.97447 |
| Desorption | 0.08985 | 0.98324 | 0.25806 | 0.98714 |


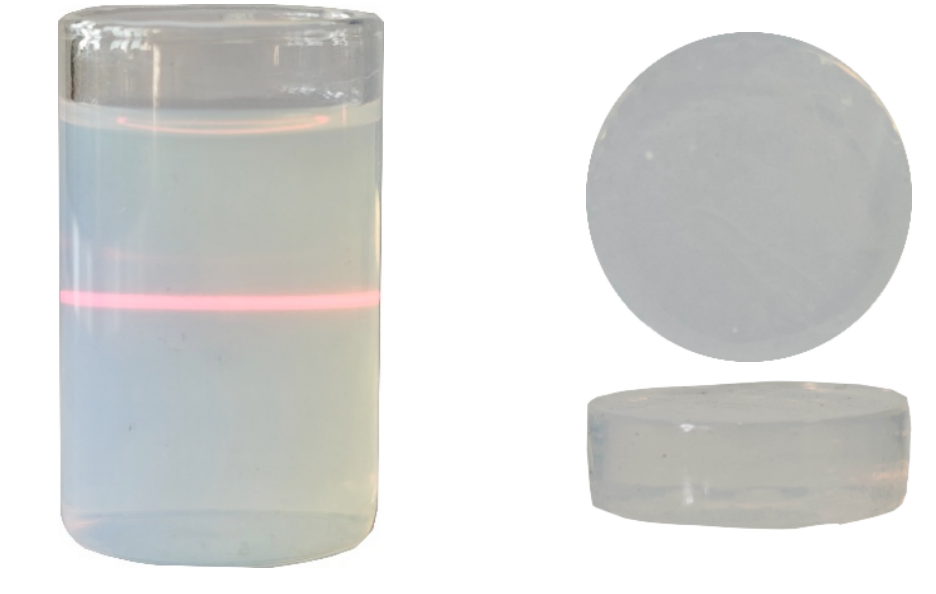


**Fig. S1** Titanium dioxide quantum dot (TDQD) colloid (left) and TDQD/PAM hydrogel (right)


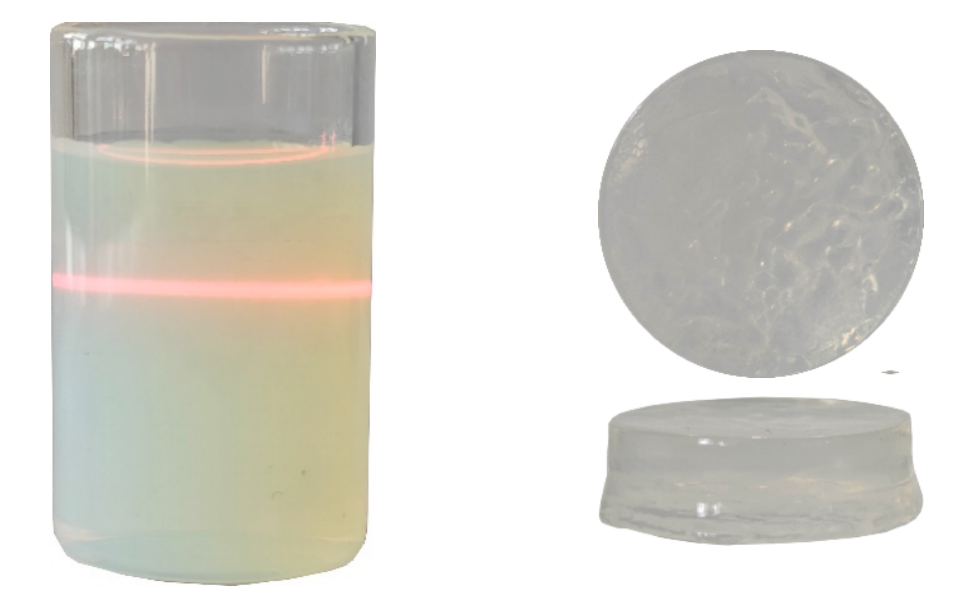


**Fig. S2** g-C3N4 quantum dots (CNQD) colloid (left) and CNQD/PAM hydrogel (right)


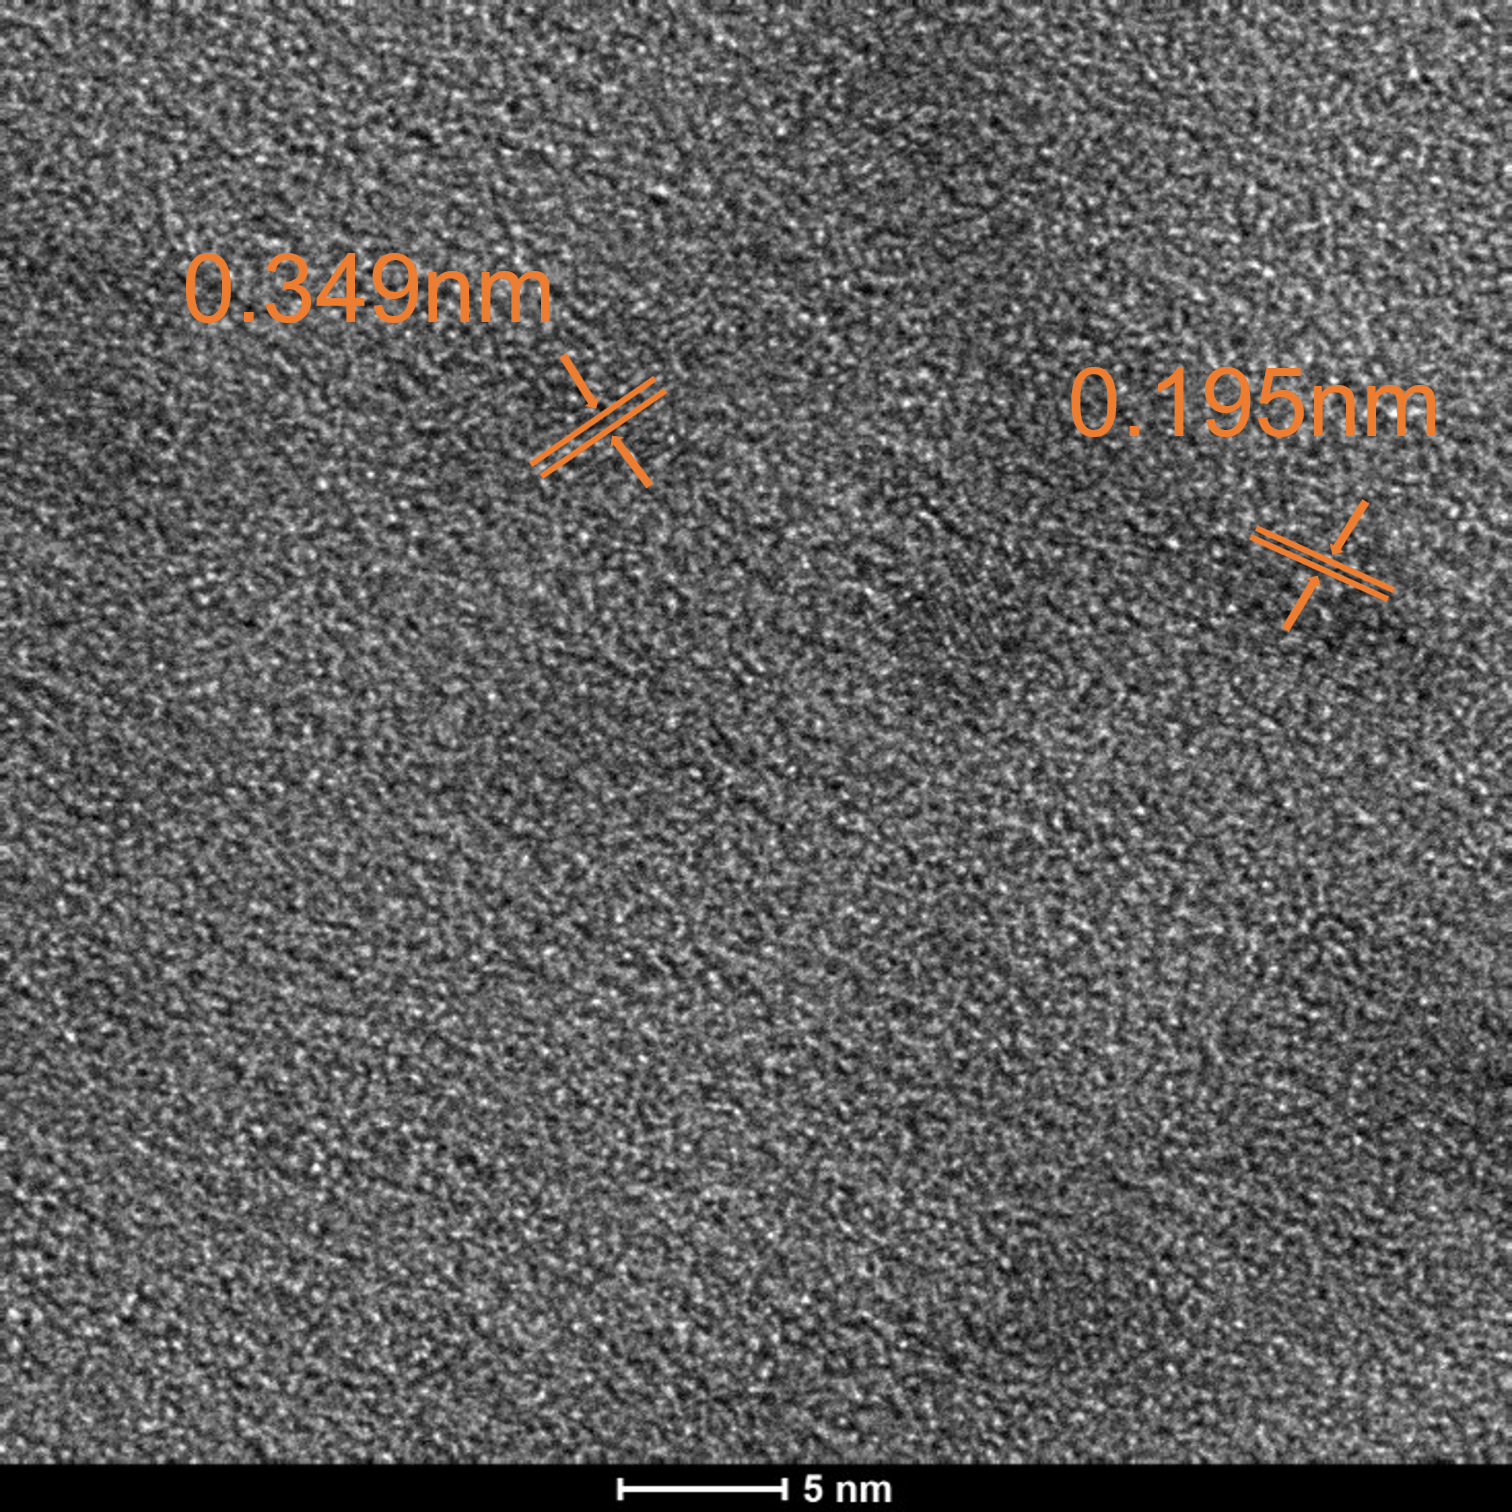

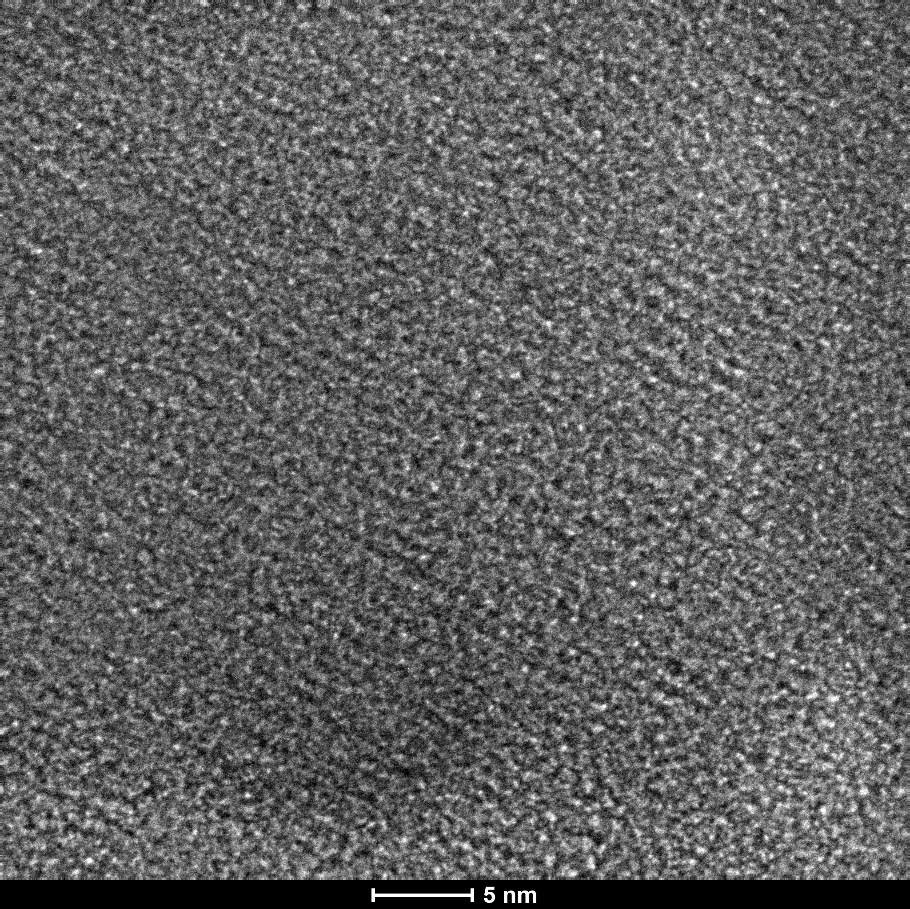


**Fig. S3** HRTEM images of TDQD/PAM and CNQD/PAM


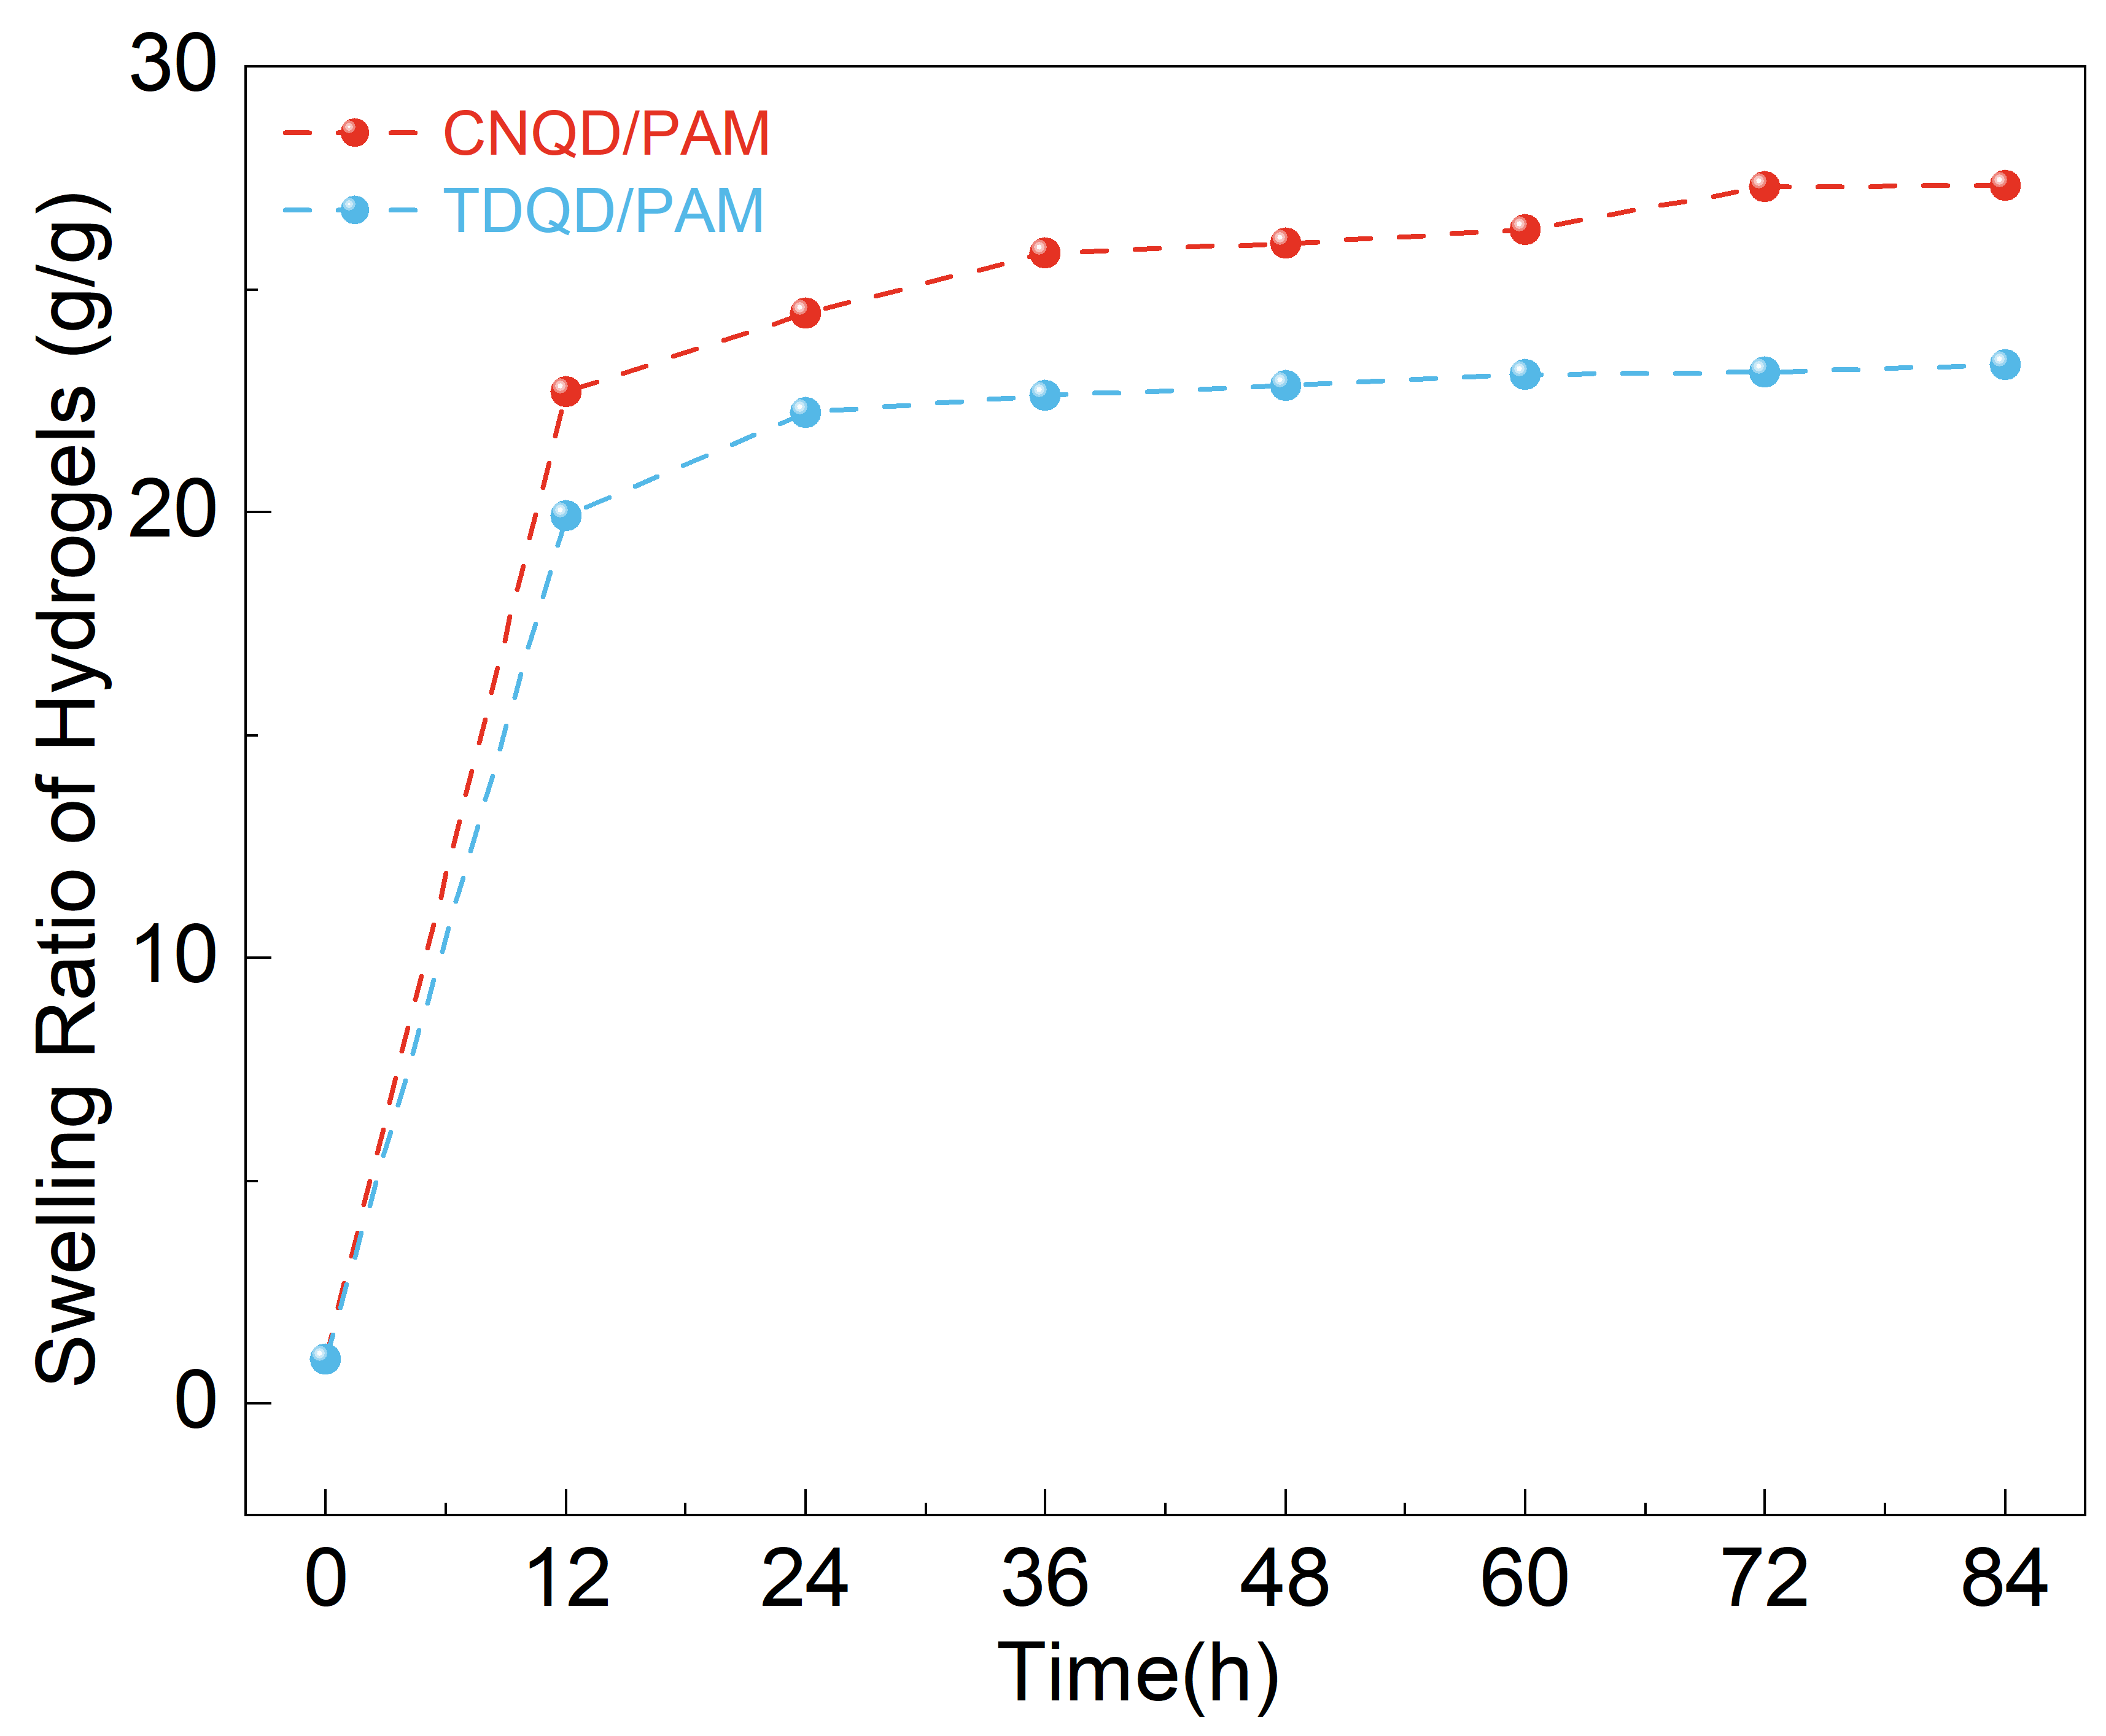


**Fig. S4** Swelling behavior of CNQD/PAM and TDQD/PAM hydrogels over time


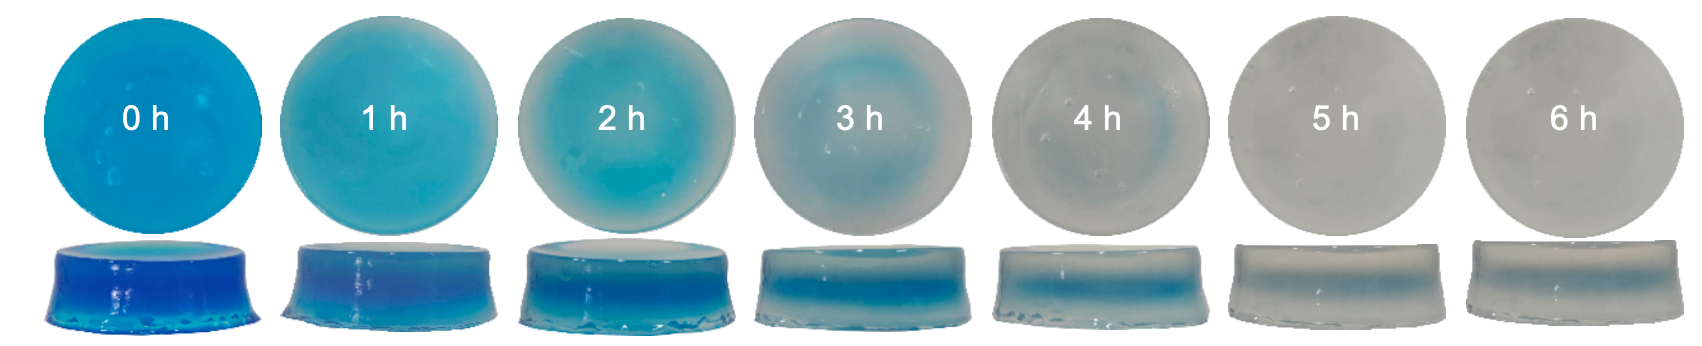


**Fig. S5** Decomposition of adsorbed MB under light irradiation in CNQD/PAM
